# Supplementary material for: The Burden of Thin Melanomas in Tuscany, Italy, 1985–2017: Age- and Sex-Specific Temporal Trends in Incidence and Mortality
Source: MDPI journal article supplement (doi:10.3390/cancers16030536), 2024-01-26

**Table S1.** Distribution of incident cutaneous melanoma included in the analyses in terms of anatomical location and histological subtype. Tuscany, central Italy, 1985-2017. Only cutaneous melanoma with known Breslow thickness at diagnosis (n=6,002) were included.

| <b>Anatomical location</b>     |       |       |
|--------------------------------|-------|-------|
| Trunk                          | 1,794 | 29.9% |
| Head and neck                  | 416   | 6.9%  |
| Upper limbs                    | 631   | 10.5% |
| Lower limbs                    | 1,164 | 19.4% |
| Overlapping areas              | 13    | 0.2%  |
| Not specified                  | 1,984 | 33.1% |
| <b>Histological subtype</b>    |       |       |
| Superficial spreading melanoma | 4,281 | 71.3% |
| Nodular melanoma               | 453   | 7.5%  |
| Lentigo maligna                | 192   | 3.2%  |
| Acral lentiginous melanoma     | 185   | 3.1%  |
| Other subtypes                 | 196   | 3.3%  |
| Not specified                  | 695   | 11.6% |

**Table S2.** Number of incident cutaneous melanoma cases among both sexes combined, standardized incidence rate (with 95% confidence intervals, CI), and annual percent changes (APC) in different periods, stratified by age group. Tuscany, central Italy, 1985-2017. Only cutaneous melanoma with known Breslow thickness at diagnosis were included.

| Age group   | Melanoma cases (N) | Standardized incidence rate | 95% CI        | Trend 1   |         | Trend 2   |                    |
|-------------|--------------------|-----------------------------|---------------|-----------|---------|-----------|--------------------|
|             |                    |                             |               | Years     | APC     | Years     | APC <sup>(a)</sup> |
| <40 years   |                    |                             |               |           |         |           |                    |
| ≤1 mm       | 731                | 3.9                         | (3.6 - 4.2)   | 1985-2017 | + 6.7%  |           |                    |
| >1-4 mm     | 227                | 1.2                         | (1.1 - 1.4)   | 1985-2017 | + 2.9%  |           |                    |
| >4 mm       | 36                 | 0.2                         | (0.1 - 0.3)   | 1985-2004 | + 11.4% | 2004-2017 | - 11.7%            |
| 40-64 years |                    |                             |               |           |         |           |                    |
| ≤1 mm       | 1,903              | 14.5                        | (13.8 - 15.1) | 1985-2017 | + 7.3%  |           |                    |
| >1-4 mm     | 727                | 5.5                         | (5.1 – 6.0)   | 1985-2017 | + 1.8%  |           |                    |
| >4 mm       | 153                | 1.2                         | (1.0 - 1.4)   | 1985-2017 | ns      |           |                    |
| ≥65 years   |                    |                             |               |           |         |           |                    |
| ≤1 mm       | 1,200              | 14.9                        | (14.1 - 15.8) | 1985-2017 | + 9.3%  |           |                    |
| >1-4 mm     | 694                | 8.5                         | (7.9 - 9.2)   | 1985-2017 | + 3.2%  |           |                    |
| >4 mm       | 331                | 4.0                         | (3.6 - 4.5)   | 1985-2005 | + 5.6%  | 2005-2017 | - 7.1%             |
| All ages    |                    |                             |               |           |         |           |                    |
| ≤1 mm       | 3,834              | 9.6                         | (9.3 - 9.9)   | 1985-2009 | + 9.9%  | 2009-2017 | + 3.0%             |
| >1-4 mm     | 1,648              | 4.1                         | (3.9 - 4.3)   | 1985-2017 | + 2.4%  |           |                    |
| >4 mm       | 520                | 1.3                         | (1.2 - 1.4)   | 1985-2007 | + 4.7%  | 2006-2017 | ns                 |

ns: not significant

<sup>(a)</sup> only shown when statistically significant

**Table S3.** Survival at 1, 2, 3, 4, 5, and 10 years from diagnosis (with 95% confidence intervals, CI), of cutaneous melanoma according to sex and Breslow thickness at diagnosis. Tuscany, central Italy, 1985-2017. Only cutaneous melanoma with known Breslow thickness at diagnosis were included.

| Sex   | Age group | Breslow thickness | 1 year   |                | 2 years  |                | 3 years  |                | 4 years  |                | 5 years  |                | 10 years |                |
|-------|-----------|-------------------|----------|----------------|----------|----------------|----------|----------------|----------|----------------|----------|----------------|----------|----------------|
|       |           |                   | survival | 95% CI         |
| any   | any       | ≤1 mm             | 0.994    | (0.991; 0.996) | 0.987    | (0.983; 0.990) | 0.977    | (0.972; 0.982) | 0.965    | (0.958; 0.971) | 0.953    | (0.945; 0.960) | 0.894    | (0.882; 0.906) |
| men   | any       | ≤1 mm             | 0.990    | (0.983; 0.994) | 0.982    | (0.974; 0.988) | 0.969    | (0.959; 0.977) | 0.951    | (0.939; 0.960) | 0.933    | (0.919; 0.945) | 0.868    | (0.847; 0.886) |
| women | any       | ≤1 mm             | 0.998    | (0.994; 0.999) | 0.992    | (0.986; 0.995) | 0.985    | (0.978; 0.990) | 0.978    | (0.969; 0.984) | 0.970    | (0.961; 0.978) | 0.918    | (0.902; 0.931) |
| any   | any       | >1-4 mm           | 0.970    | (0.960; 0.978) | 0.914    | (0.898; 0.927) | 0.854    | (0.835; 0.872) | 0.806    | (0.784; 0.825) | 0.757    | (0.733; 0.778) | 0.635    | (0.608; 0.660) |
| men   | any       | >1-4 mm           | 0.961    | (0.944; 0.973) | 0.891    | (0.866; 0.912) | 0.825    | (0.796; 0.982) | 0.775    | (0.743; 0.804) | 0.714    | (0.678; 0.746) | 0.578    | (0.538; 0.615) |
| women | any       | >1-4 mm           | 0.979    | (0.966; 0.987) | 0.936    | (0.916; 0.952) | 0.883    | (0.858; 0.905) | 0.836    | (0.807; 0.862) | 0.799    | (0.768; 0.827) | 0.690    | (0.654; 0.724) |
| any   | any       | >4 mm             | 0.863    | (0.827; 0.892) | 0.700    | (0.654; 0.741) | 0.549    | (0.501; 0.594) | 0.462    | (0.414; 0.508) | 0.406    | (0.359; 0.453) | 0.286    | (0.242; 0.330) |
| men   | any       | >4 mm             | 0.863    | (0.813; 0.901) | 0.676    | (0.613; 0.731) | 0.535    | (0.47; 0.596)  | 0.442    | (0.379; 0.504) | 0.389    | (0.327; 0.451) | 0.271    | (0.214; 0.330) |
| women | any       | >4 mm             | 0.862    | (0.805; 0.904) | 0.730    | (0.661; 0.788) | 0.566    | (0.492; 0.633) | 0.487    | (0.414; 0.556) | 0.428    | (0.356; 0.497) | 0.305    | (0.239; 0.373) |

**Figure S1.** Annual age-standardized melanoma incidence rates among men, overall and according to Breslow thickness at diagnosis ( $\leq 1$ ,  $>1-4$ ,  $>4$  mm), and corresponding temporal trends (calculated via joinpoint analysis – see text for details). Tuscany, central Italy, 1985-2017. Only cutaneous melanoma with known Breslow thickness at diagnosis were included.

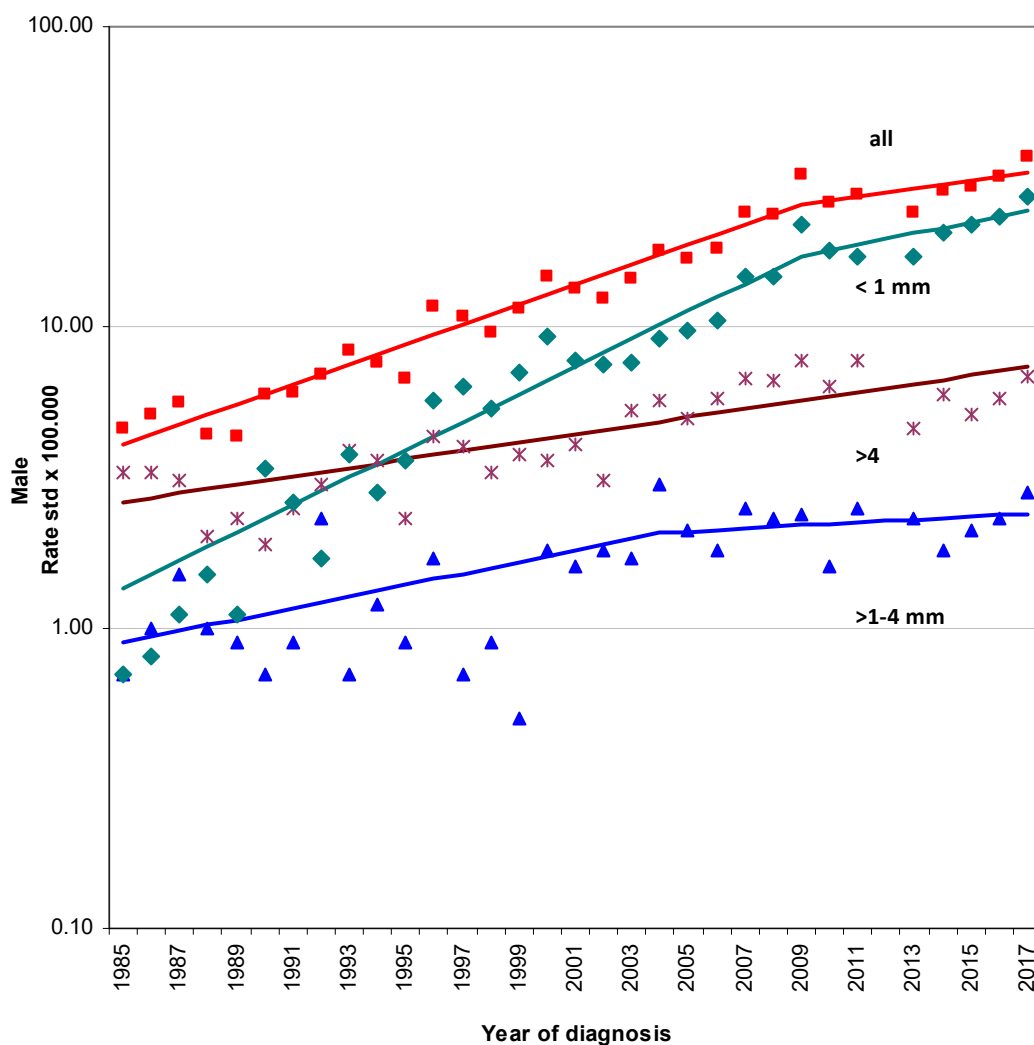

**Figure S2.** Annual age-standardized melanoma incidence rates among women, overall and according to Breslow thickness at diagnosis ( $\leq 1$ ,  $>1-4$ ,  $>4$  mm), and corresponding temporal trends (calculated via joinpoint analysis – see text for details). Tuscany, central Italy, 1985-2017. Only cutaneous melanoma with known Breslow thickness at diagnosis were included.

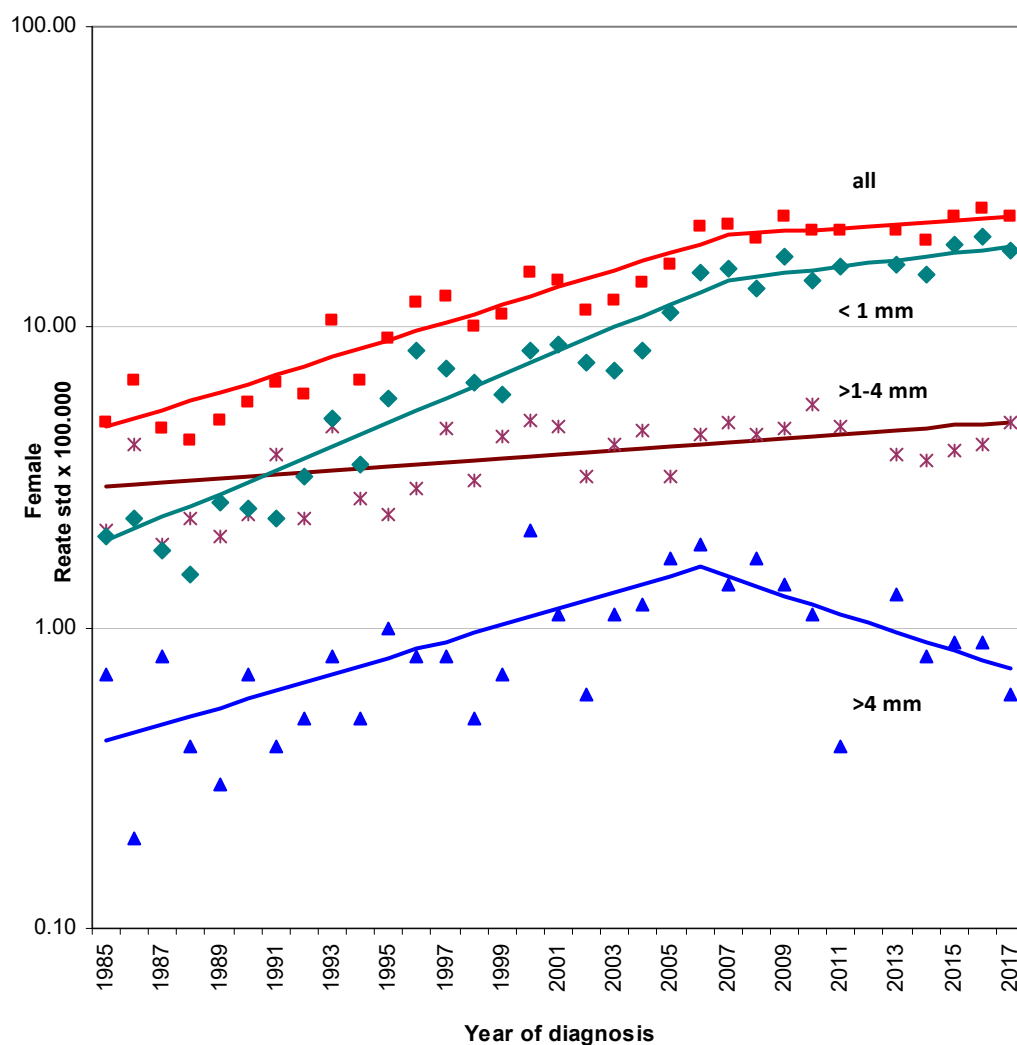

Supplement: s1 [file s1]
